# Supplementary material for: Immunomodulatory effects and improved outcomes with cisplatin- versus carboplatin-based chemotherapy plus atezolizumab in urothelial cancer
Source: PubMed Central journal article supplement (PMC10897541; doi:10.1016/j.xcrm.2024.101393), 2024-01-26
Supplement: mmc1.pdf [file mmc1.pdf]

**Supplemental information**

**Immunomodulatory effects and improved outcomes with cisplatin- versus carboplatin-based chemotherapy plus atezolizumab in urothelial cancer**

**Matthew D. Galsky, Xiangnan Guan, Deepali Rishipathak, Aaron S. Rapaport, Hesham M. Shehata, Romain Banchereau, Kobe Yuen, Eugene Varfolomeev, Ruozen Hu, Chia-Jung Han, Haocheng Li, Yuxin Liang, Domagoj Vucic, Li Wang, Jun Zhu, Haocheng Yu, Rebecca H. Herbst, Emma Hajaj, Evgeny Kiner, Aristotelis Bamias, Maria De Santis, Ian D. Davis, José Ángel Arranz, Eiji Kikuchi, Sandrine Bernhard, Patrick Williams, Chooi Lee, Ira Mellman, Shomyseh Sanjabi, Robert Johnston, Peter C. Black, Enrique Grande, and Sanjeev Mariathasan**

**Table S1. Baseline patient characteristics across different treatment arms in the CITE-Seq cohort. Related to**

**Figure 1.**

|                                                  | GemCis (n=19) | GemCarbo (n=19) | Atezolizumab (n=33) | GemCis + Atezolizumab (n=15) | GemCarbo + Atezolizumab (n=27) |
|--------------------------------------------------|---------------|-----------------|---------------------|------------------------------|--------------------------------|
| Age, years                                       | 62(50-74)     | 66(45-87)       | 66(51-81)           | 65(53.5-76.5)                | 67(58-76)                      |
| Age group, years                                 |               |                 |                     |                              |                                |
| <65                                              | 10(53%)       | 8(42%)          | 16(48%)             | 7(47%)                       | 10(37%)                        |
| >=65                                             | 9(47%)        | 11(58%)         | 17(52%)             | 8(53%)                       | 17(63%)                        |
| Gender                                           |               |                 |                     |                              |                                |
| Female                                           | 1(5%)         | 11(58%)         | 4(12%)              | 5(33%)                       | 5(19%)                         |
| Male                                             | 18(95%)       | 8(42%)          | 29(88%)             | 10(67%)                      | 22(81%)                        |
| Race                                             |               |                 |                     |                              |                                |
| White                                            | 17(89%)       | 15(79%)         | 22(67%)             | 13(87%)                      | 23(85%)                        |
| Black or African American                        | 0(<1%)        | 0(<1%)          | 0(<1%)              | 0(<1%)                       | 0(<1%)                         |
| Asian                                            | 2(11%)        | 4(21%)          | 11(33%)             | 2(13%)                       | 3(11%)                         |
| American Indian or Alaska Native                 | 0(<1%)        | 0(<1%)          | 0(<1%)              | 0(<1%)                       | 1(4%)                          |
| Native Hawaiian or other Pacific Islander        | 0(<1%)        | 0(<1%)          | 0(<1%)              | 0(<1%)                       | 0(<1%)                         |
| Multiple races                                   | 0(<1%)        | 0(<1%)          | 0(<1%)              | 0(<1%)                       | 0(<1%)                         |
| Unknown                                          | 0(<1%)        | 0(<1%)          | 0(<1%)              | 0(<1%)                       | 0(<1%)                         |
| Tobacco use history                              |               |                 |                     |                              |                                |
| Never                                            | 9(47%)        | 8(42%)          | 7(21%)              | 6(40%)                       | 8(30%)                         |
| Current                                          | 4(21%)        | 1(5%)           | 7(21%)              | 4(27%)                       | 6(22%)                         |
| Former                                           | 6(32%)        | 10(53%)         | 19(58%)             | 5(33%)                       | 13(48%)                        |
| Primary tumor site                               |               |                 |                     |                              |                                |
| Bladder                                          | 16(84%)       | 13(68%)         | 26(79%)             | 11(73%)                      | 19(70%)                        |
| Urethra                                          | 0(<1%)        | 0(<1%)          | 1(3%)               | 1(7%)                        | 0(<1%)                         |
| Renal pelvis                                     | 1(5%)         | 3(16%)          | 5(15%)              | 1(7%)                        | 6(22%)                         |
| Ureter                                           | 2(11%)        | 1(5%)           | 1(3%)               | 2(13%)                       | 2(7%)                          |
| Other                                            | 0(<1%)        | 2(11%)          | 0(<1%)              | 0(<1%)                       | 0(<1%)                         |
| Disease status                                   |               |                 |                     |                              |                                |
| Locally advanced                                 | 0(<1%)        | 1(5%)           | 2(6%)               | 1(7%)                        | 3(11%)                         |
| Metastatic                                       | 19(100%)      | 18(95%)         | 31(94%)             | 14(93%)                      | 24(89%)                        |
| Site of metastatic disease                       |               |                 |                     |                              |                                |
| Lymph node only                                  | 5(26%)        | 0(<1%)          | 7(21%)              | 4(27%)                       | 3(11%)                         |
| Visceral                                         | 12(63%)       | 13(68%)         | 22(67%)             | 8(53%)                       | 18(67%)                        |
| Liver                                            | 7(37%)        | 7(37%)          | 9(27%)              | 1(7%)                        | 11(41%)                        |
| ECOG performance status                          |               |                 |                     |                              |                                |
| 0                                                | 11(58%)       | 4(21%)          | 15(45%)             | 5(33%)                       | 8(30%)                         |
| 1                                                | 7(37%)        | 13(68%)         | 16(48%)             | 10(67%)                      | 13(48%)                        |
| 2                                                | 1(5%)         | 2(11%)          | 2(6%)               | 0(<1%)                       | 6(22%)                         |
| Programmed death-ligand 1 status on immune cells |               |                 |                     |                              |                                |
| IC2/3                                            | 5(26%)        | 3(16%)          | 11(33%)             | 4(27%)                       | 5(19%)                         |
| IC0/1                                            | 14(74%)       | 16(84%)         | 22(67%)             | 11(73%)                      | 22(81%)                        |

Data are n (%) unless indicated otherwise.

**Table S2. Comparison of baseline characteristics in the CITE-Seq (n = 113) versus non-CITE-Seq cohort (N = 1100). Related to Figure 1.**

|                                                  | Non-scSeq patients (n=1100) | scSeq patients (n=113) |
|--------------------------------------------------|-----------------------------|------------------------|
| Age, years                                       | 68(56-80)                   | 66(52-80)              |
| Age group, years                                 |                             |                        |
| <65                                              | 396(36%)                    | 51(45%)                |
| >=65                                             | 704(64%)                    | 62(55%)                |
| Gender                                           |                             |                        |
| Female                                           | 270(25%)                    | 26(23%)                |
| Male                                             | 830(75%)                    | 87(77%)                |
| Race                                             |                             |                        |
| White                                            | 821(75%)                    | 90(80%)                |
| Black or African American                        | 7(1%)                       | 0(<1%)                 |
| Asian                                            | 247(22%)                    | 22(19%)                |
| American Indian or Alaska Native                 | 8(1%)                       | 1(1%)                  |
| Native Hawaiian or other Pacific Islander        | 1(<1%)                      | 0(<1%)                 |
| Multiple races                                   | 1(<1%)                      | 0(<1%)                 |
| Unknown                                          | 15(1%)                      | 0(<1%)                 |
| Tobacco use history                              |                             |                        |
| Never                                            | 403(37%)                    | 38(34%)                |
| Current                                          | 174(16%)                    | 22(19%)                |
| Former                                           | 523(48%)                    | 53(47%)                |
| Primary tumor site                               |                             |                        |
| Bladder                                          | 782(71%)                    | 85(75%)                |
| Urethra                                          | 19(2%)                      | 2(2%)                  |
| Renal pelvis                                     | 161(15%)                    | 16(14%)                |
| Ureter                                           | 129(12%)                    | 8(7%)                  |
| Other                                            | 9(1%)                       | 2(2%)                  |
| Disease status                                   |                             |                        |
| Locally advanced                                 | 121(11%)                    | 7(6%)                  |
| Metastatic                                       | 979(89%)                    | 106(94%)               |
| Site of metastatic disease                       |                             |                        |
| Lymph node only                                  | 199(18%)                    | 19(17%)                |
| Visceral                                         | 627(57%)                    | 73(65%)                |
| Liver                                            | 237(22%)                    | 35(31%)                |
| ECOG performance status                          |                             |                        |
| 0                                                | 469(43%)                    | 43(38%)                |
| 1                                                | 511(46%)                    | 59(52%)                |
| 2                                                | 120(11%)                    | 11(10%)                |
| Programmed death-ligand 1 status on immune cells |                             |                        |
| IC2/3                                            | 256(23%)                    | 28(25%)                |
| IC0/1                                            | 844(77%)                    | 85(75%)                |

Data are n (%) unless indicated otherwise.

**A****GemCis + placebo or + atezolizumab**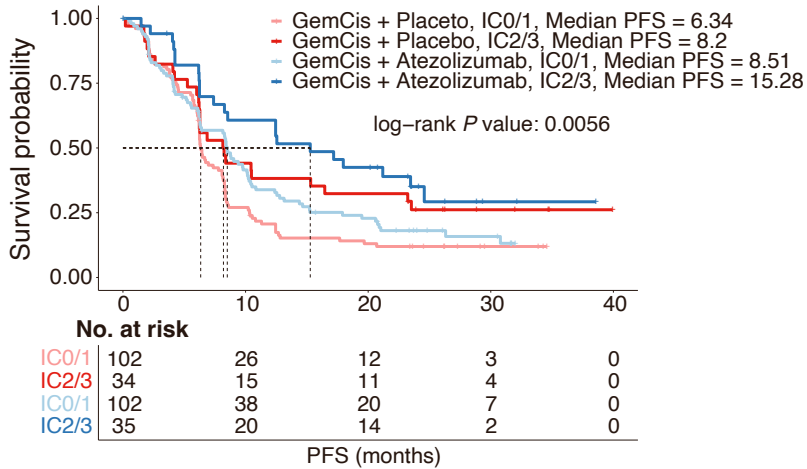**B****GemCarbo + placebo or + atezolizumab**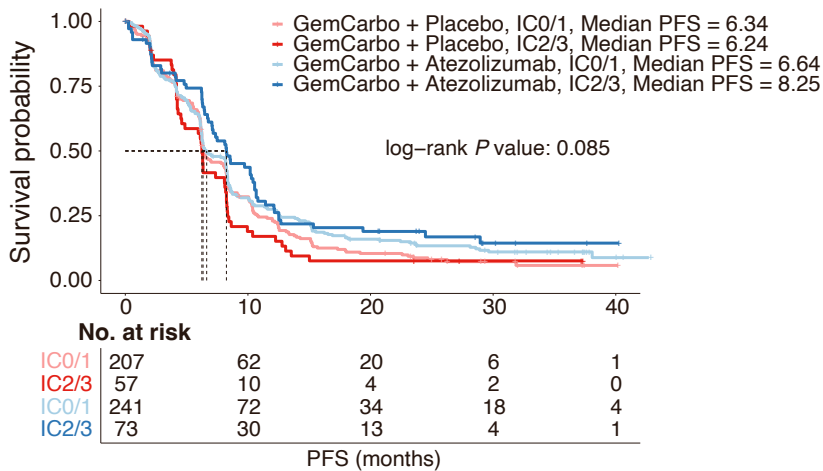

**Figure S1. Progression-free survival outcomes with GemCis, but not with GemCarbo, are dependent on pre-treatment tumor PD-L1 expression. Related to Figure 1.**

(A-B) Kaplan-Meier curves showing progression-free survival in patients receiving GemCis plus atezolizumab or placebo (A) or GemCarbo plus atezolizumab or placebo (B), stratified by tumor PD-L1 expression as measured by SP142 staining. *P* values were estimated using the log-rank test.

**A**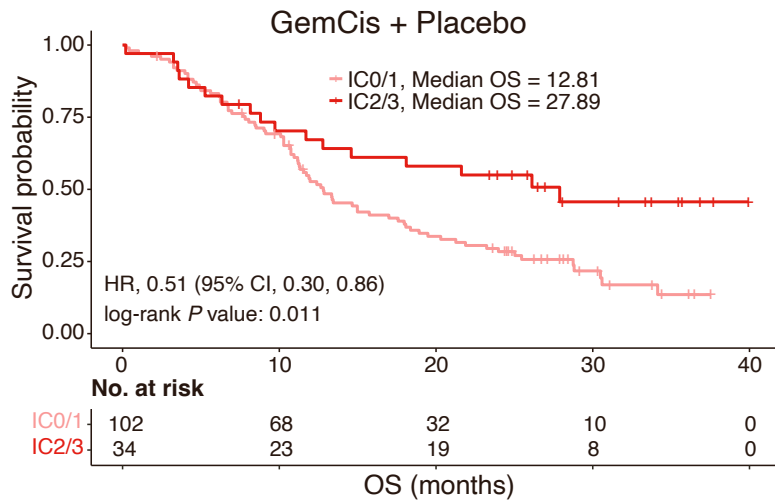**B**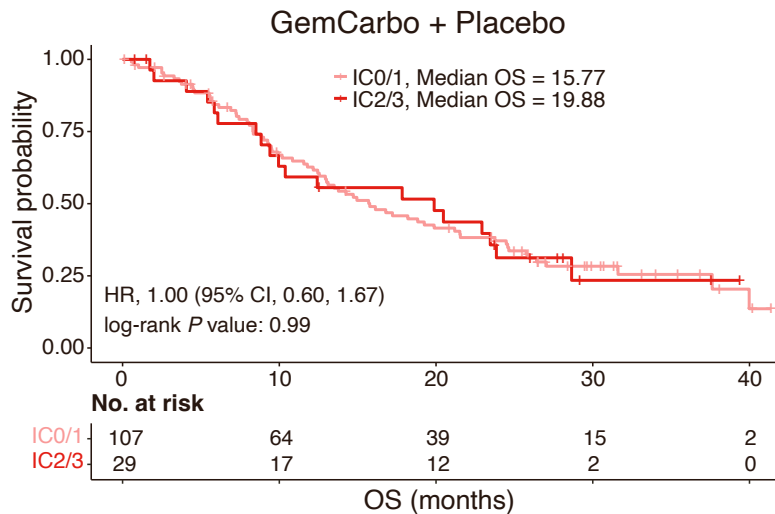

**Figure S2. Survival outcomes with GemCis, but not with GemCarbo, are dependent on pre-treatment tumor PD-L1 expression in matched patients. Related to Figure 1.**

(A-B) Kaplan-Meier curves showing overall survival in matched patients in arm C stratified by PD-L1 status (IC2/3 versus IC0/1) and use of GemCis (A) or GemCarbo (B). Cisplatin-eligible patients receiving GemCis or GemCarbo were matched 1:1 by propensity scores calculated using age, ECOG, Bajorin risk factors, and the site of metastasis variables. Patients whose propensity scores cannot be matched were discarded. *P* values were calculated using the log-rank test. Hazard ratio and 95% confidence interval were estimated using a univariate Cox model.



**Figure S3. The proportions of major cell types in PBMCs remain unchanged after treatment. Related to Figure 3.**

(A) UMAP embedding as shown in Figure 3B as a point-density plot split by cells from arm A (N = 313,639), arm B (N = 271,779) and arm C (N = 280,504).

(B) Heatmaps showing scaled expression of the surface proteins as measured by CITE-seq (left) and the corresponding genes (right) as measured by single cell RNA-seq. The data indicated consistent expression between CITE-seq and single cell RNA-seq.

(C) Bar plot showing the abundance of different cell types in PBMCs.

(D) Box plot comparing the proportions of each cell type at baseline (C1D1) versus on-treatment (C3D1) in different treatment groups (left). Nominal P values derived from a two-tailed paired Student t-test are shown, and red asterisks represent significance (\*  $P < 0.05$ ; \*\*  $P < 0.01$ ; \*\*\*  $P < 0.001$ ). Box plots comparing the proportions of each cell type between responders (i.e., patients with complete response or partial response [CR/PR]) and nonresponders (i.e., patients with progressive disease [PD]) at baseline (C1D1, middle) and on-treatment (C3D1, right) in different treatment groups. Nominal P values derived from the two-tailed unpaired Student t-test are shown.

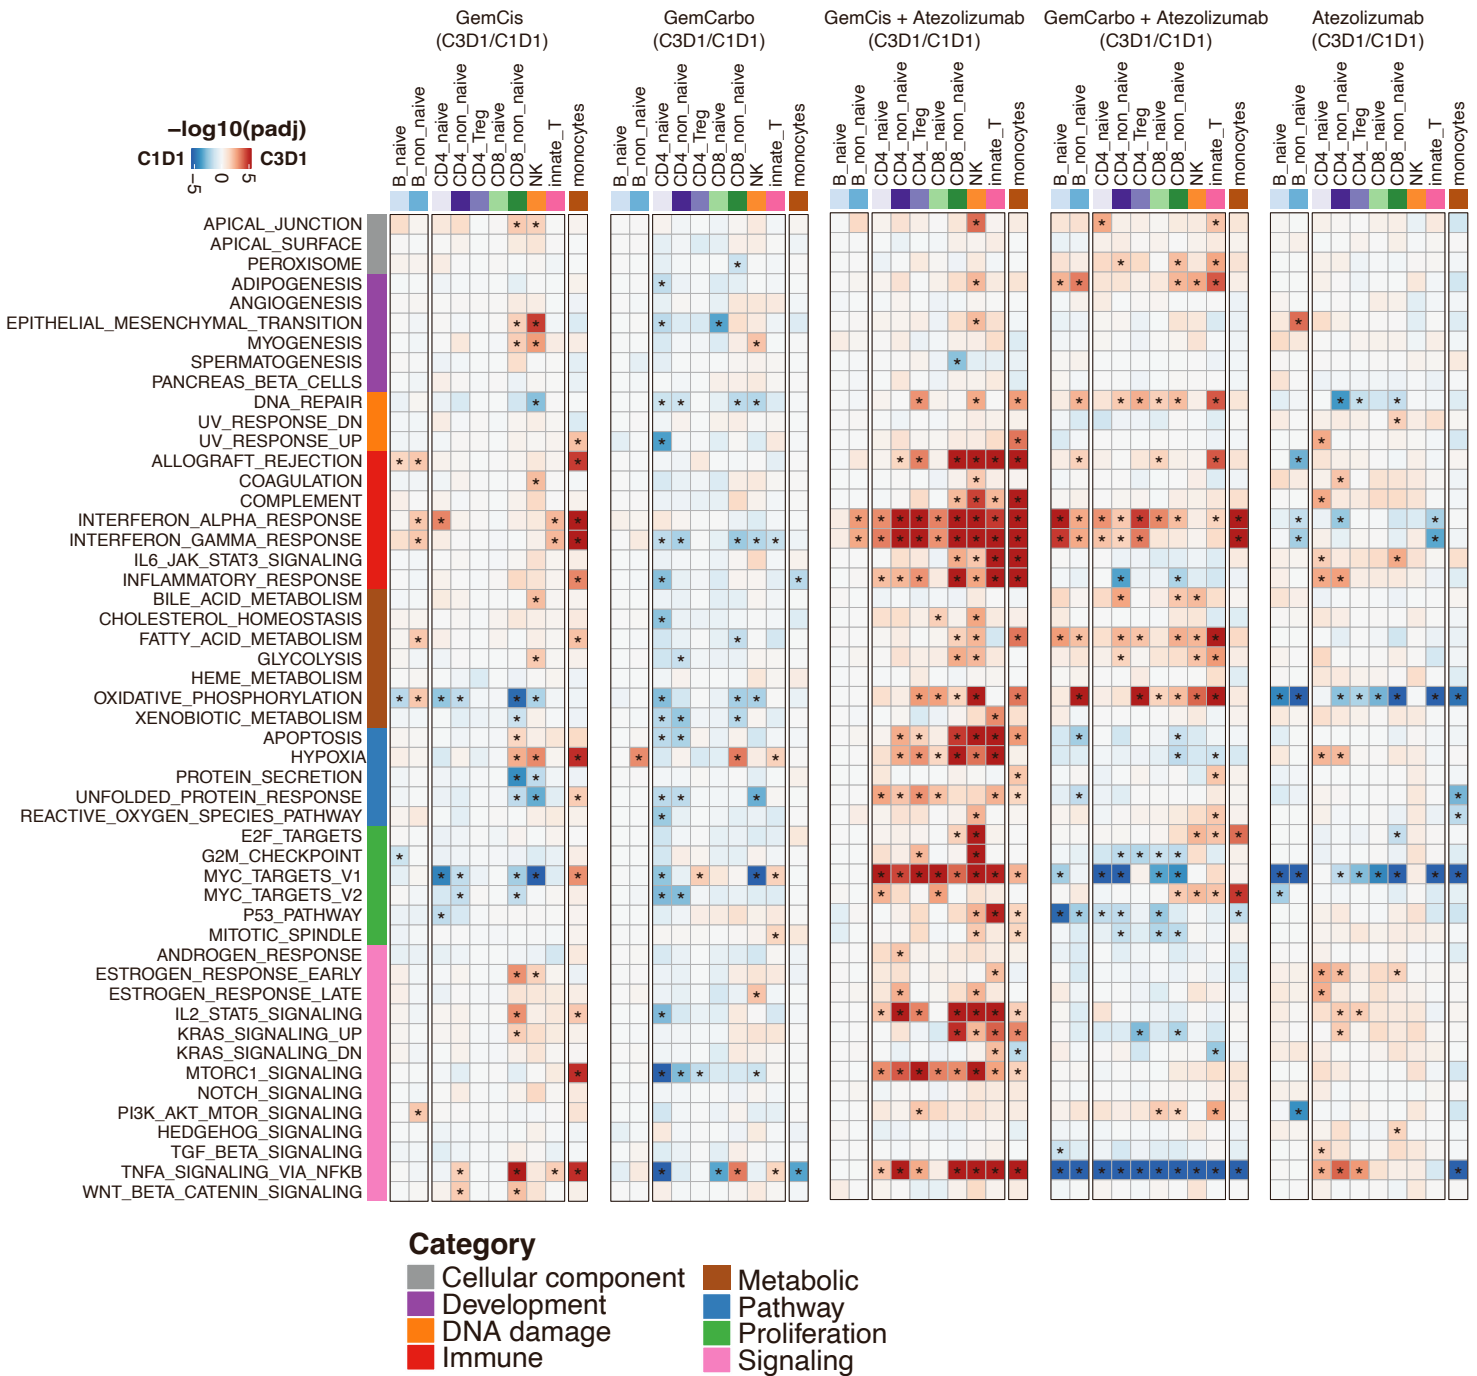

**Figure S4. GemCis with and without atezolizumab versus GemCarbo with and without atezolizumab induces proinflammatory transcriptional programs across multiple immune cell subsets in PBMCs. Related to Figure 3.**

Heatmaps comparing the pathway enrichment of all 50 Hallmark gene sets on-treatment (C3D1) versus baseline (C1D1) across multiple immune cell types in different treatment groups. Red indicates enrichment in on-treatment samples, and blue indicates enrichment at baseline. The hue represents the false-discovery rate (FDR) significance, derived from the fgsea package. Black asterisks represent FDR < 0.05.



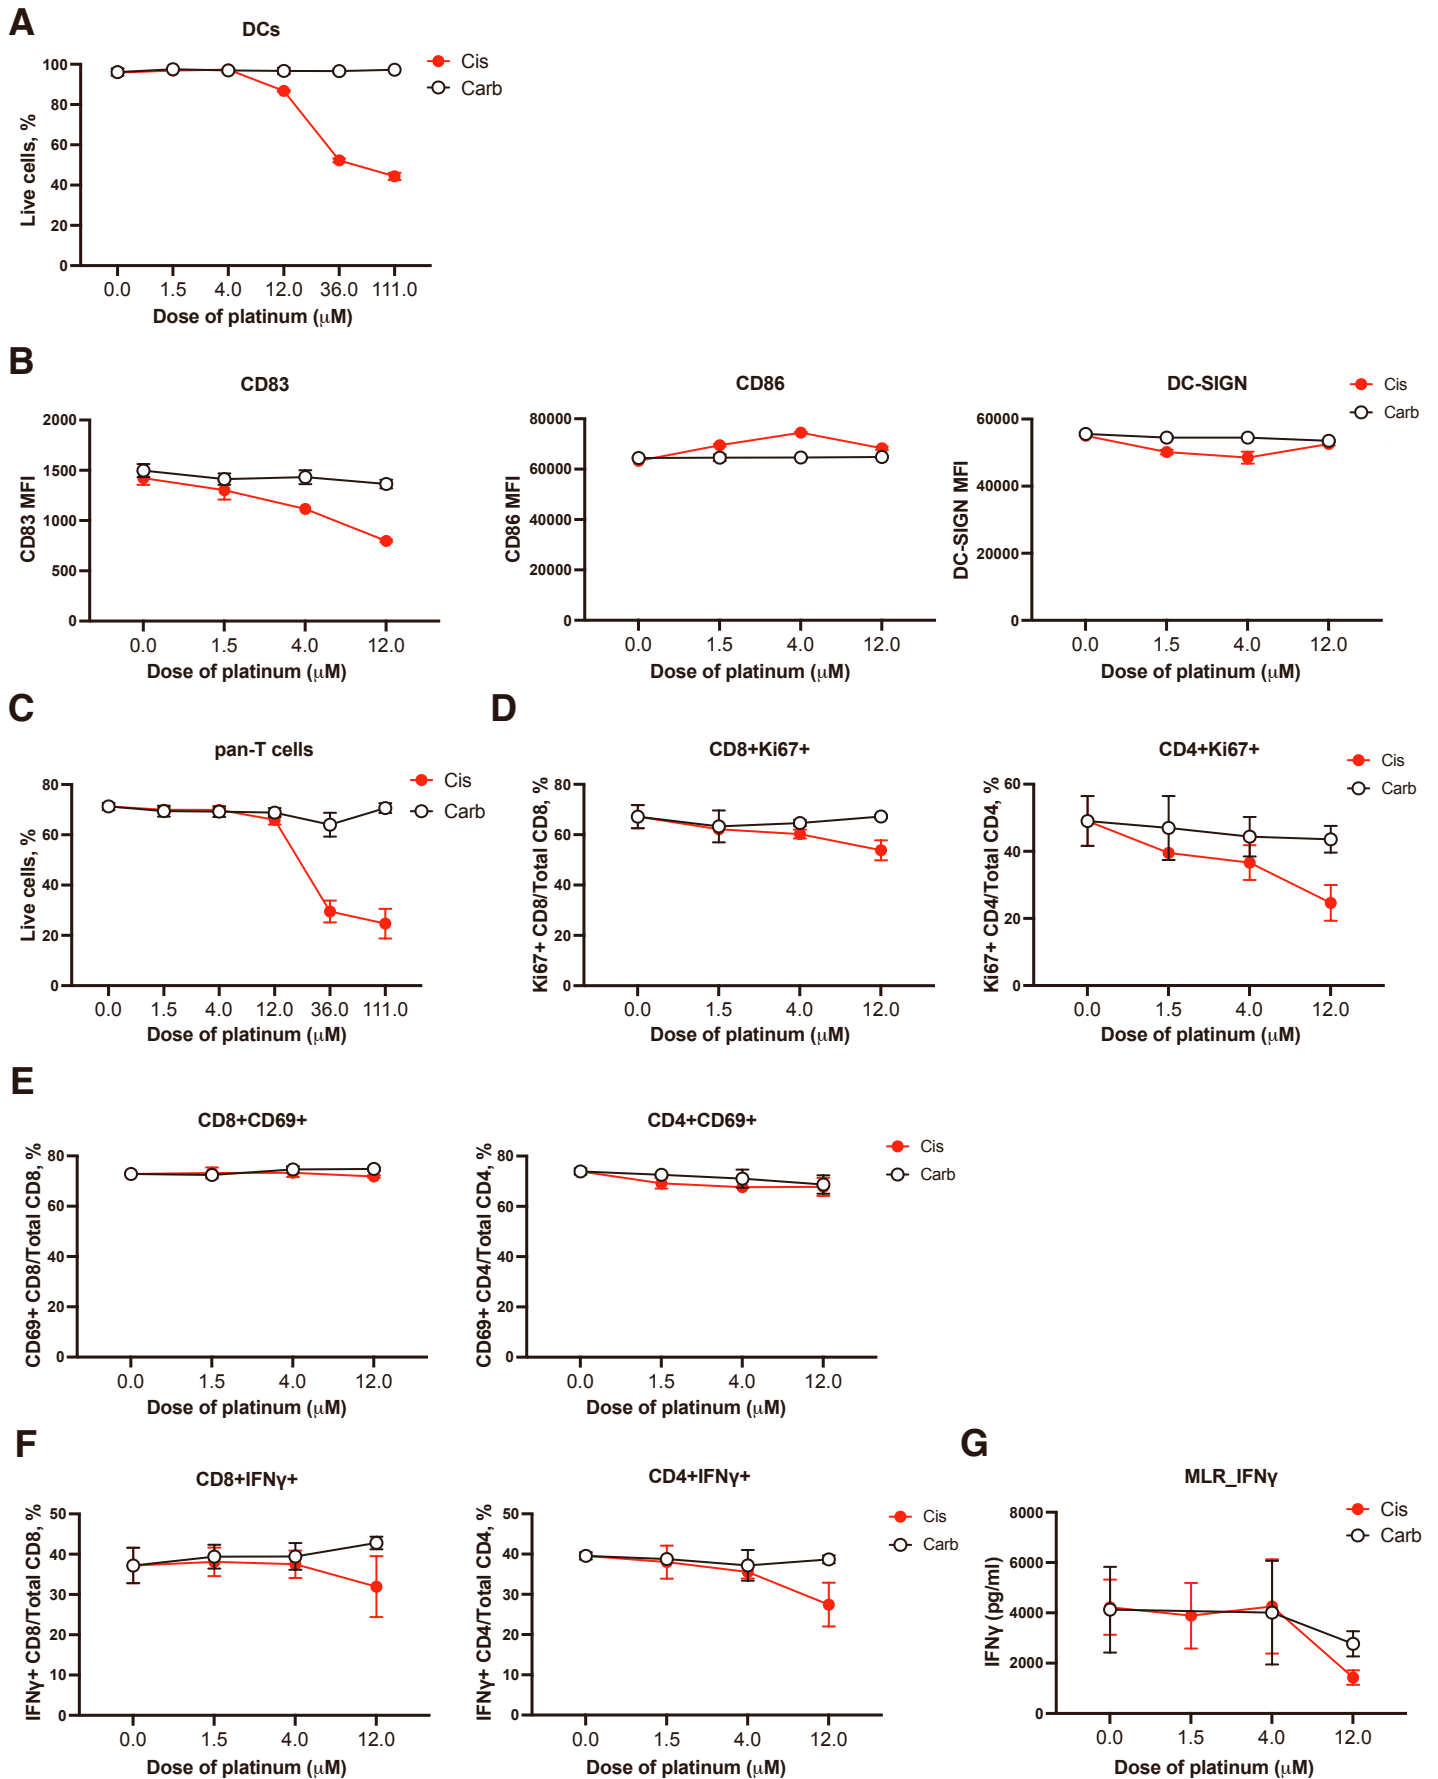

**Figure S5. Cisplatin and carboplatin at sub-cytotoxic levels do not have direct effects on the activation and function of DCs and T cells. Related to Figure 5.**

(A) Average percentages of live DCs treated with increasing concentrations of cisplatin or carboplatin (n = 3).

(B) Representative plots of CD83, CD86, and DC-SIGN surface protein expression in DCs treated with increasing concentrations of cisplatin or carboplatin (n = 3).

(C) Average percentages of live pan-T cells with increasing concentrations of cisplatin or carboplatin (n = 3).

(D) Representative plots of the percentages of proliferating CD8 (left) and CD4 (right) T cells, as measured by Ki67, after treatment with increasing concentrations of cisplatin or carboplatin (n = 3).

(E) Representative plots of the percentages of activated CD8 (left) and CD4 (right) T cells, as measured by CD69, after treatment with increasing concentrations of cisplatin or carboplatin (n = 3).

(F) Representative plots of the percentages of IFN $\gamma$ <sup>+</sup> CD8 (left) and CD4 (right) T cells after treatment with increasing concentrations of cisplatin or carboplatin (n = 3).

(G) Representative plots of IFN $\gamma$  secretion as measured in the supernatant from the co-culture of DC cells with pan-T cells treated with increasing concentrations of cisplatin or carboplatin (n = 4). In (A-G), error bars represent standard deviation.

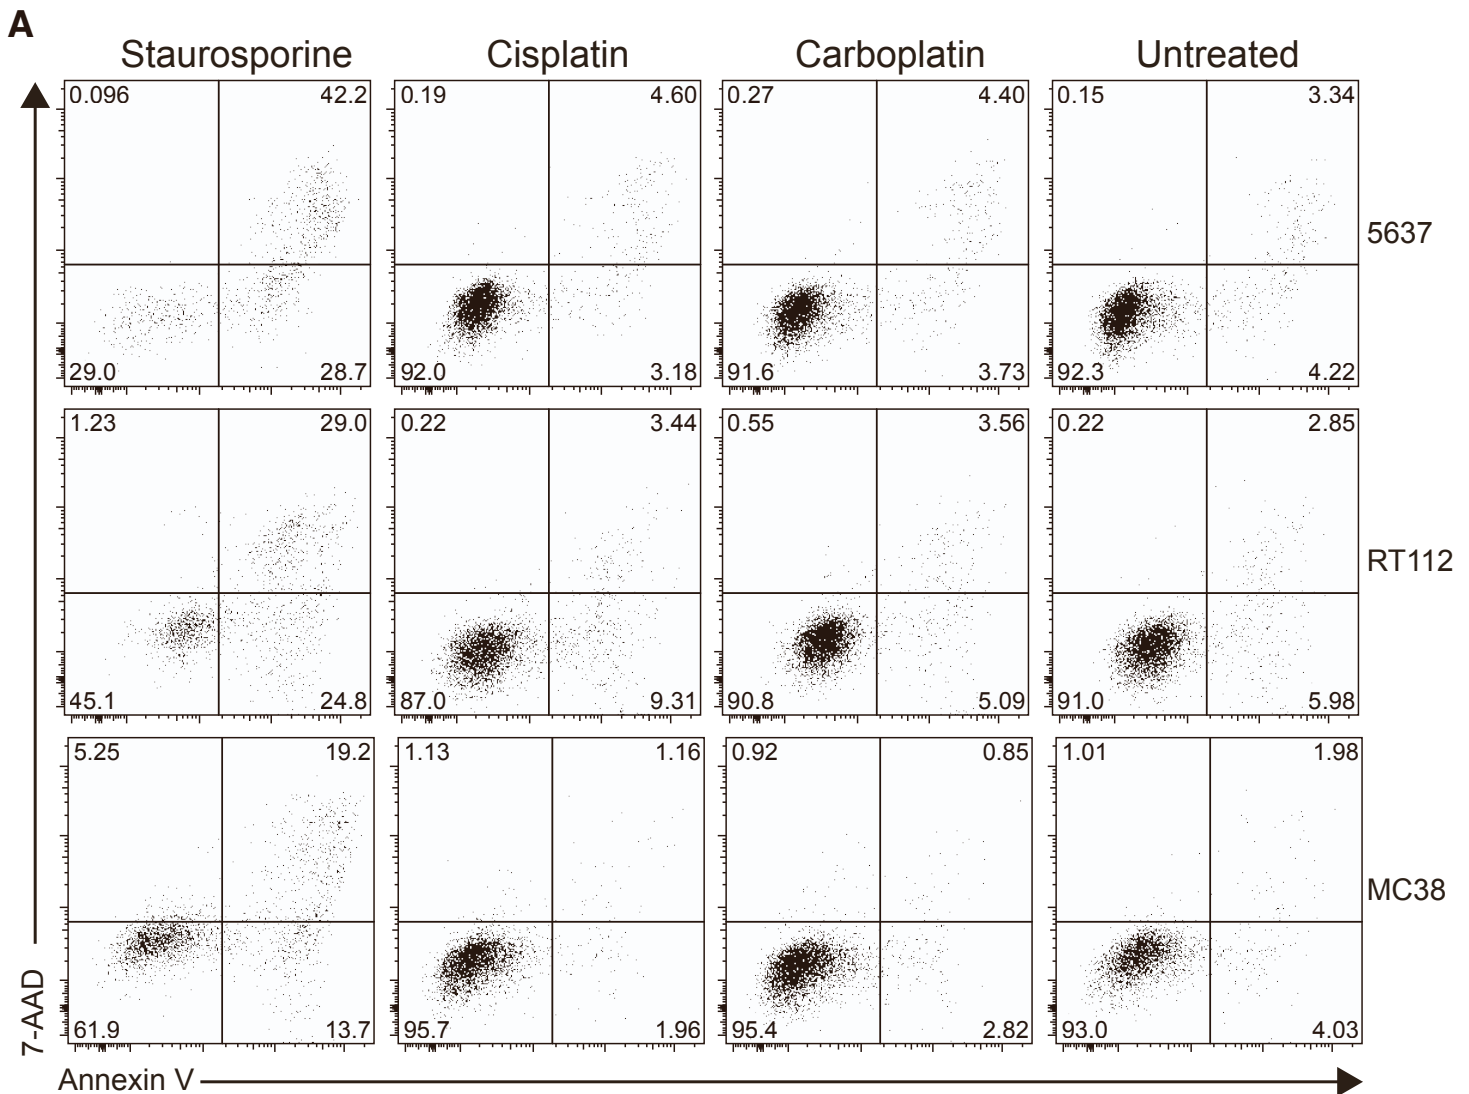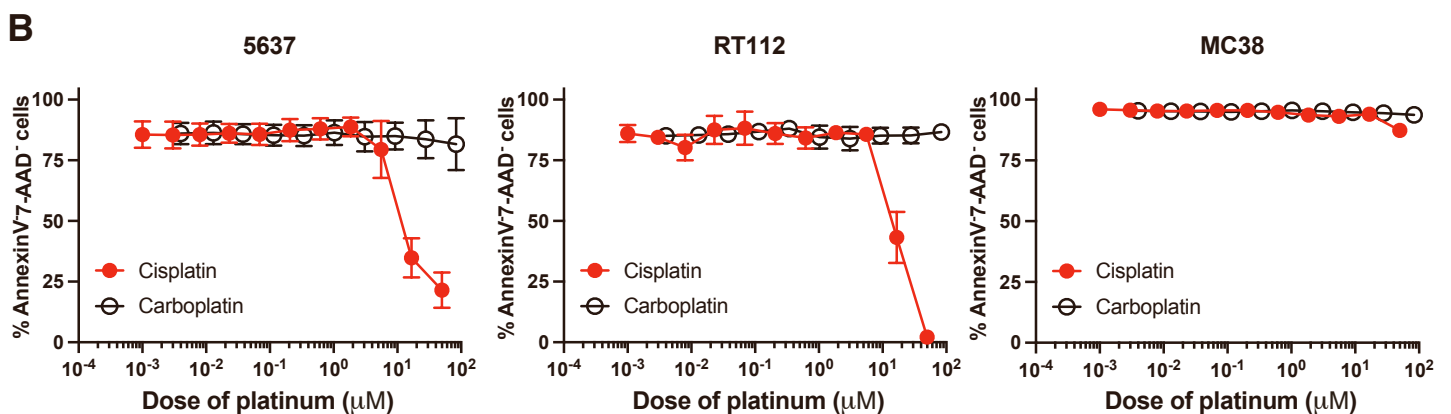

**Figure S6. Cisplatin and carboplatin do not induce apoptosis within the range of clinically relevant concentrations (i.e., approximating peak serum concentrations achieved in humans at doses used to treat UC) in human urothelial bladder cancer (5637 and RT112) and murine colon adenocarcinoma (MC38) cell lines. Related to Figure 5.**

(A) Representative flow cytogram showing tumor cell death as measured by 7-AAD and annexin V in 5637 (top), RT112 (middle), and MC38 (bottom) cell lines treated for 24 hours with staurosporine (125 nM, positive control for apoptosis induction), cisplatin (5 µM), or carboplatin (30 µM). Data depict one representative experiment of two independent experiments.

(B) Cells were treated with dose titrations of cisplatin or carboplatin. The proportions of non-apoptotic (annexin V<sup>-</sup> and 7-AAD<sup>-</sup>) cells were quantified at 24 hours posttreatment (n = 2). Data depict the aggregate of three independent experiments (mean ± SEM).

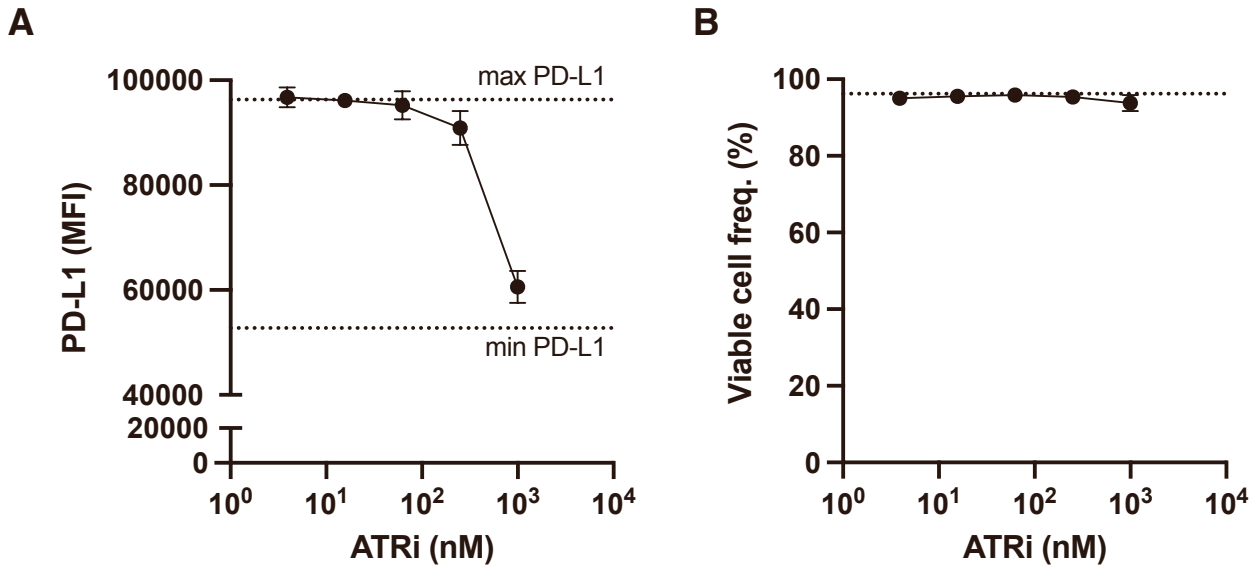

**Figure S7. ATR inhibition by VE-821 is dose dependent and does not induce cell death. Related to Figure 5.**

(A) Protein expression of PD-L1 as determined by median fluorescence intensity in the 5637 cells that were pre-treated with a dose titration of VE-821 followed by the addition of 5 $\mu$ M of cisplatin. Maximum and minimum dotted lines refer to PDL1 MFI in cisplatin-alone stimulated cells and untreated cells, respectively.

(B) Viability of the same cells as in (A), measured by 7-AAD dye incorporation. Dotted line refers to viability in untreated cells. Data depict the aggregate of two independent experiments (mean  $\pm$  SEM).

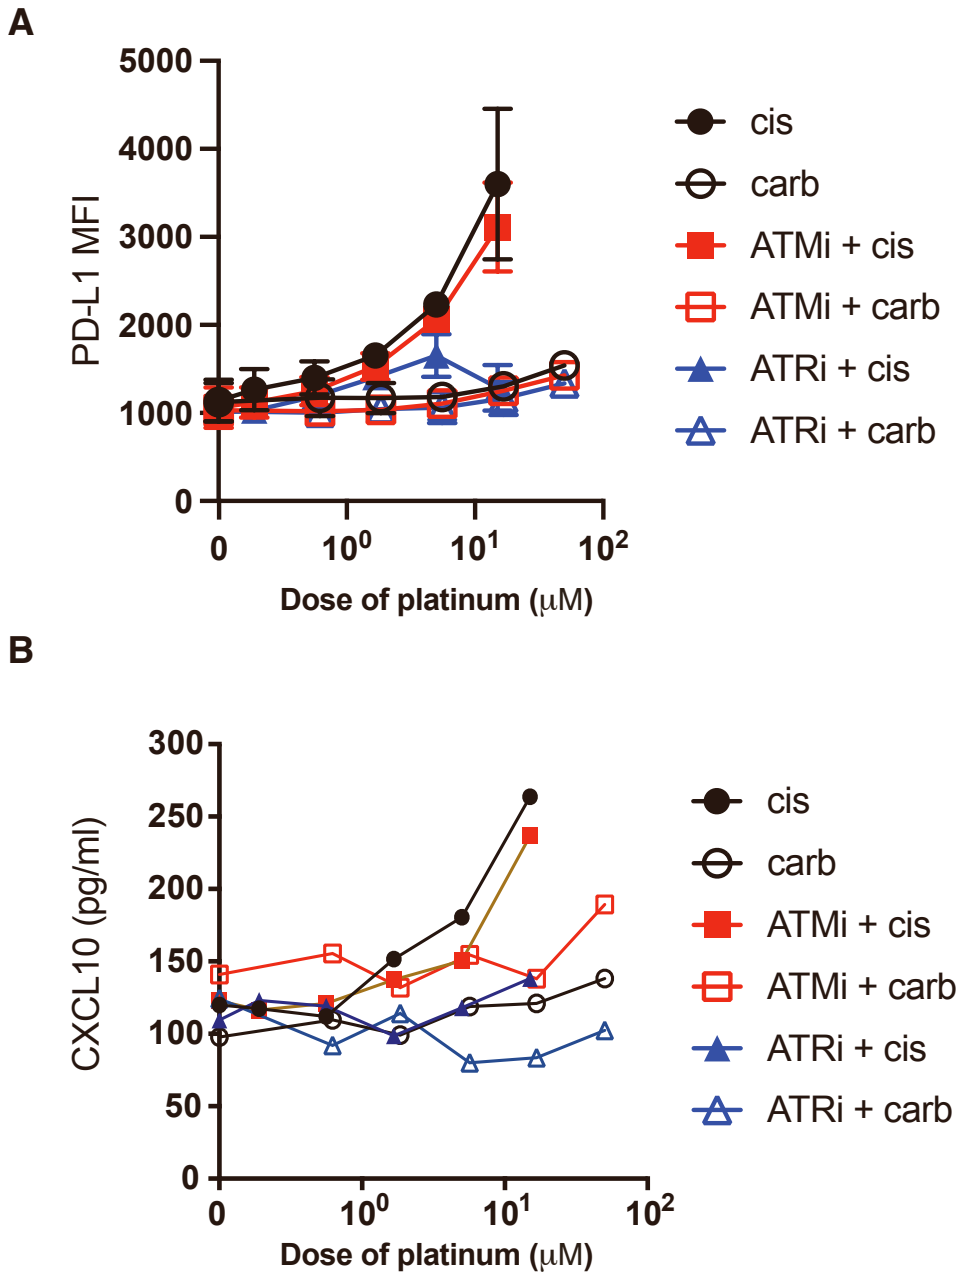

**Figure S8. The direct induction of PD-L1 and CXCL10 in MC38 cells is mediated via the DNA damage transducer ATR. Related to Figure 5.**

(A) Protein expression of PD-L1 as determined by median fluorescence intensity in the MC38 cell line treated with increasing concentrations of cisplatin or carboplatin for 24 hours, in the presence or absence of an ATM inhibitor ( $1 \mu\text{M}$ ) and ATR inhibitor ( $1 \mu\text{M}$ ) ( $n = 3$ ). Data depict the aggregate of two independent experiments (mean  $\pm$  SEM).

(B) CXCL10 (IP-10) secretion as measured by Mouse IP-10 ELISA in the supernatant collected from MC38 cells treated with increasing concentrations of cisplatin or carboplatin in the presence or absence of an ATM inhibitor ( $1 \mu\text{M}$ ) and ATR inhibitor ( $1 \mu\text{M}$ ). Supernatant was collected 24 hours after treatment. Data depict one experiment with duplicate conditions.

**A**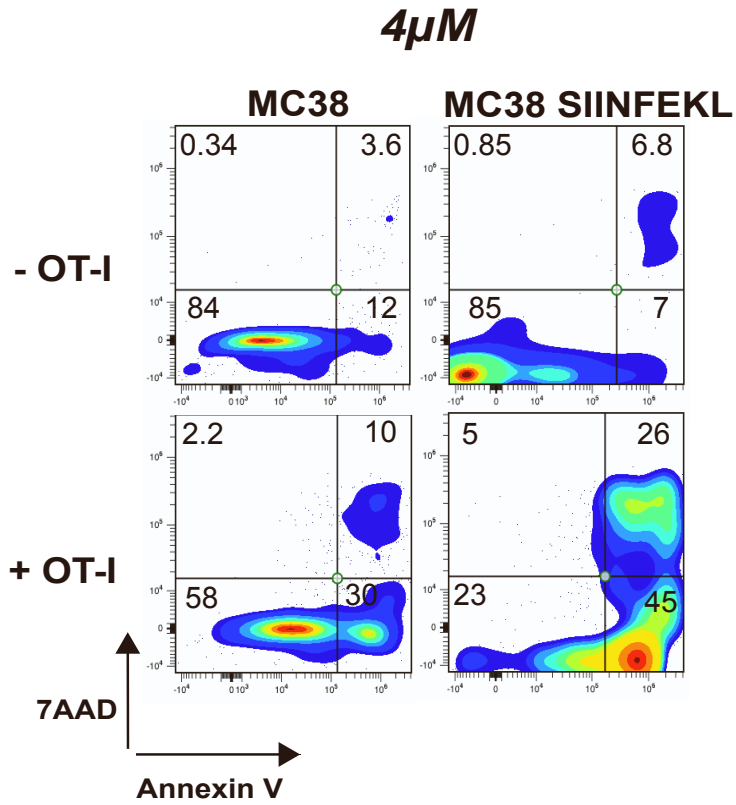**B**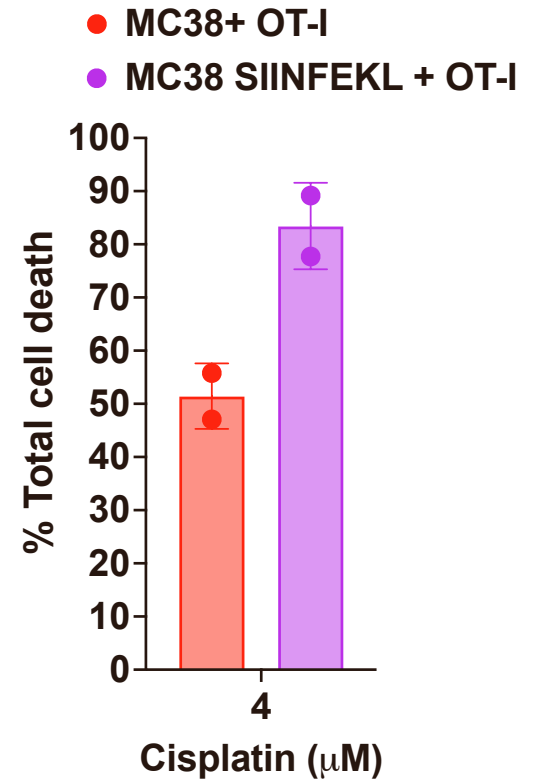

**Figure S9. OT-I T-cell-mediated killing of MC38 tumor cells that express or do not express SIINFEKL OVA peptide. Related to Figure 6.**

(A) Representative flow cytometry plots showing OT-I mediated cell killing of MC38 and MC38-SIINFEKL as measured by 7-AAD and annexin V staining within the tumor cells.

(B) The summarized percentage of OT-I T-cell-mediated tumor cell death. MC38 tumor cells were pretreated with or without 4 $\mu$ M of cisplatin for 24 hours, followed by co-culture with OT-I T cells for 5 hours before the assay. Data are mean  $\pm$  SD.

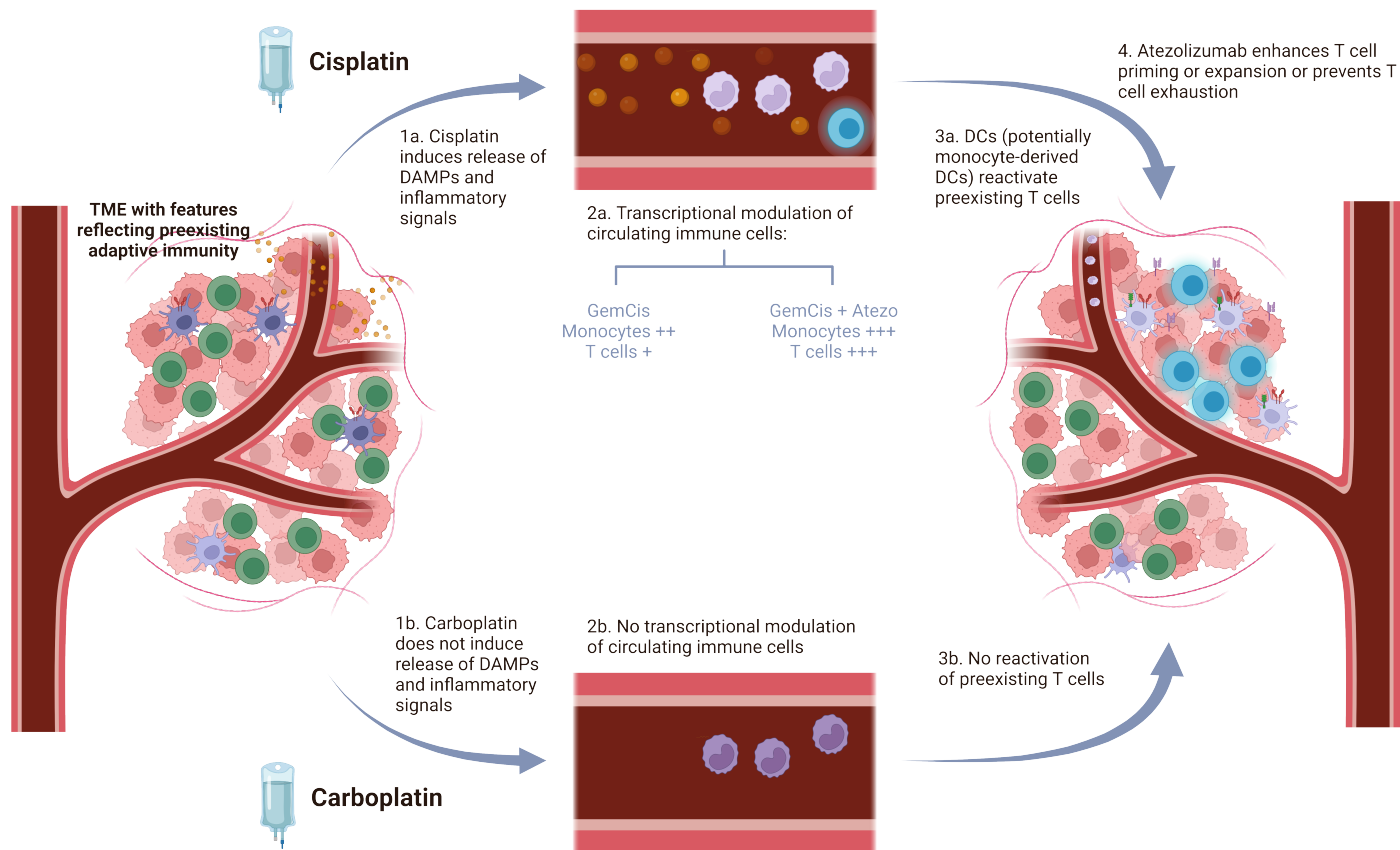

**Figure S10. Proposed model for effects of cisplatin with and without atezolizumab on the cancer-immunity cycle. Related to Figures 1-6.**

The model proposed involves direct modulation of cisplatin vs carboplatin on cancer cells (1), and secondary modulation on monocytes / DCs and T cells in the peripheral blood (2), ultimately leading to an enhanced immune niche favoring cancer cell killing (3), which is further enhanced by atezolizumab preventing T cell exhaustion (4). DAMP, danger-associated molecular pattern; DC, dendritic cell; GemCarbo, gemcitabine plus carboplatin; GemCis, gemcitabine plus cisplatin; TME, tumor microenvironment.
